# Supplementary figures and images for: Temperature induced diameter variation of silicon nanowires via a liquid–solid phase transition in the Zn seed
Source: Royal Society of Chemistry journal article supplement (doi:10.1039/d1cc04427c), 2021-01-01

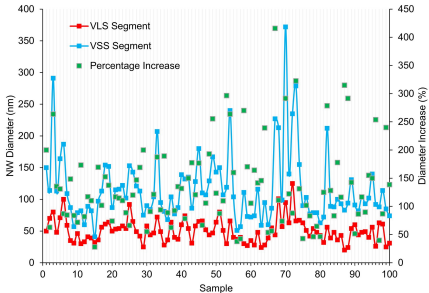

Supplement: d1cc04427c10.pdf [file d1cc04427c10.pdf]

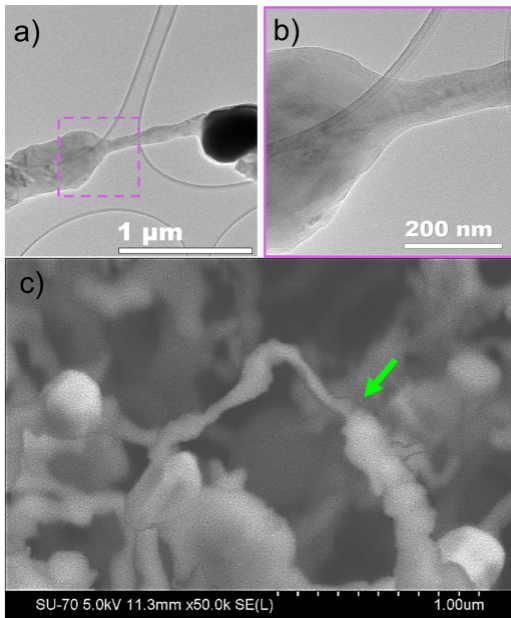

Supplement: d1cc04427c11.pdf [file d1cc04427c11.pdf]

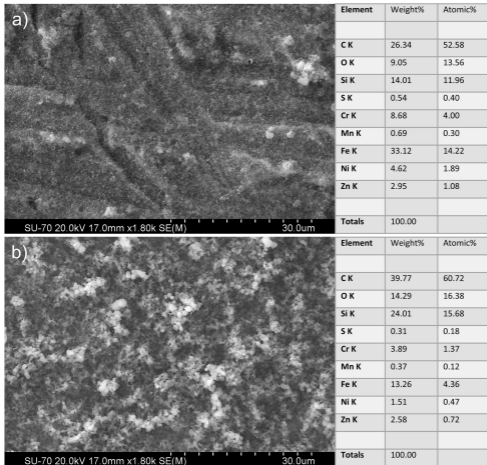

Supplement: d1cc04427c2.pdf [file d1cc04427c2.pdf]

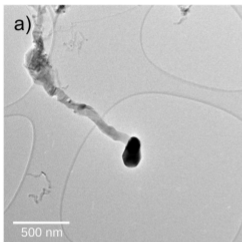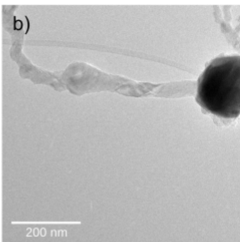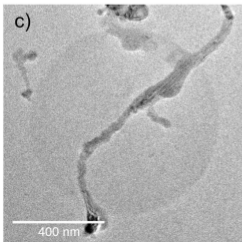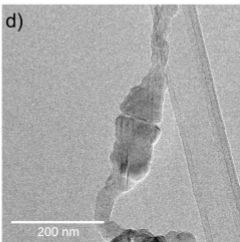

Supplement: d1cc04427c3.pdf [file d1cc04427c3.pdf]

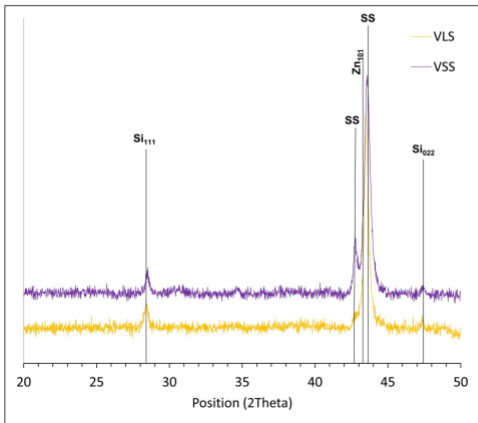

Supplement: d1cc04427c4.pdf [file d1cc04427c4.pdf]

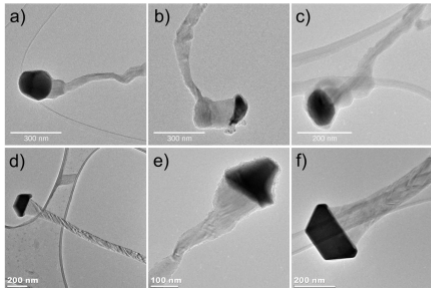

Supplement: d1cc04427c5.pdf [file d1cc04427c5.pdf]

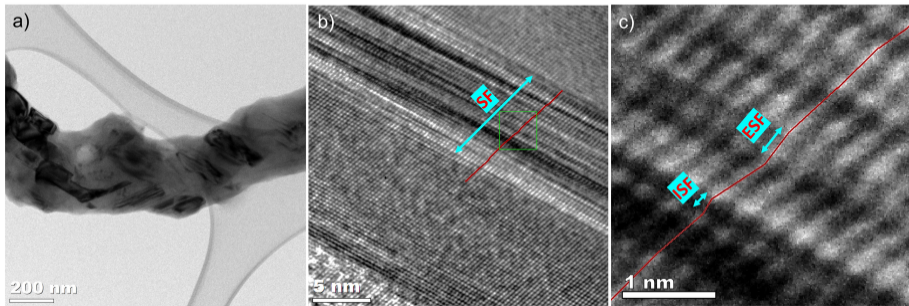

Supplement: d1cc04427c6.pdf [file d1cc04427c6.pdf]

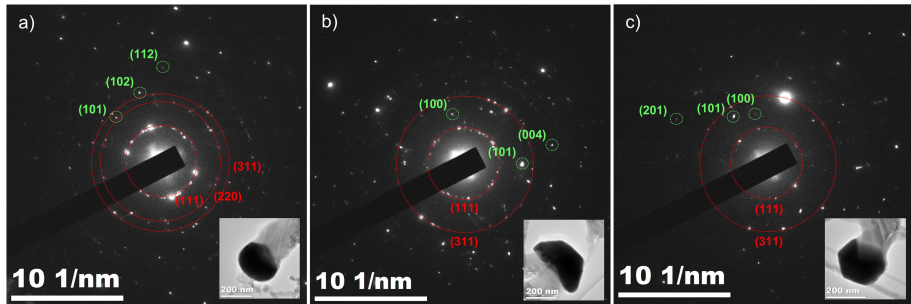

Supplement: d1cc04427c7.pdf [file d1cc04427c7.pdf]

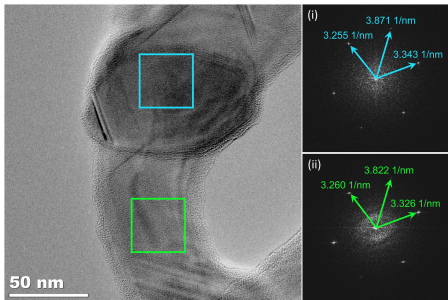

Supplement: d1cc04427c8.pdf [file d1cc04427c8.pdf]

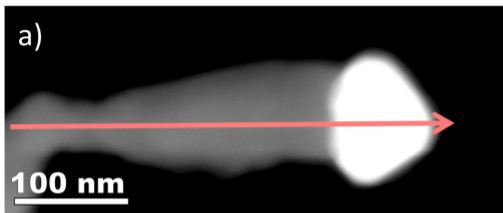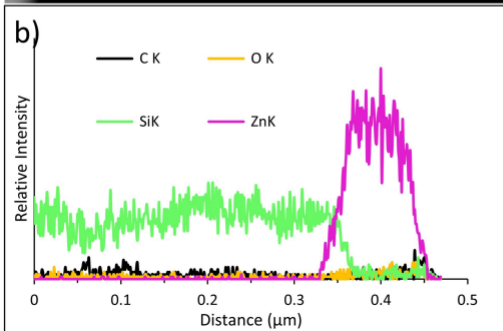

Supplement: d1cc04427c9.pdf [file d1cc04427c9.pdf]
